# Supplementary material for: Chronic oral exposure to glycated whey proteins increases survival of aged male NOD mice with autoimmune prostatitis by regulating the gut microbiome and anti-inflammatory responses
Source: Royal Society of Chemistry journal article supplement (doi:10.1039/c9fo01740b), 2019-11-26
Supplement: c9fo01740b1.pdf [file c9fo01740b1.pdf]

**Supplementary table 1.** Organ weight in male NOD mice treated with NR or EGPs daily for 3 and 6 months

|          | Spleen           | Liver          | AP             | Kidney           | GI             | Heart           | Thymus           | Lung           | SV             |
|----------|------------------|----------------|----------------|------------------|----------------|-----------------|------------------|----------------|----------------|
| 3 months |                  |                |                |                  |                |                 |                  |                |                |
| NR       | 0.092 ±<br>0.006 | 1.901<br>±     | 0.072<br>±     | 0.585 ±<br>0.053 | 4.222<br>±     | 0.191<br>±      | 0.060 ±<br>0.015 | 0.268<br>±     | 0.483<br>±     |
| EGPs     | 0.105 ±<br>0.007 | 1.983<br>±     | 0.056<br>±     | 0.557 ±<br>0.027 | 4.077<br>±     | 0.228<br>± 0.14 | 0.082 ±<br>0.011 | 0.261<br>±     | 0.445<br>±     |
|          |                  | 0.186<br>0.133 | 0.018<br>0.004 |                  | 0.395<br>0.291 |                 |                  | 0.020<br>0.016 | 0.075<br>0.052 |
| 6 months |                  |                |                |                  |                |                 |                  |                |                |
| NR       | 0.093 ±<br>0.017 | 1.740<br>±     | 0.092<br>±     | 0.556 ±<br>0.026 | 4.478<br>±     | 0.203<br>±      | 0.043 ±<br>0.004 | 0.238<br>±     | 0.420<br>±     |
| EGPs     | 0.080 ±<br>0.003 | 1.731<br>±     | 0.092<br>±     | 0.552 ±<br>0.013 | 4.290<br>±     | 0.220<br>±      | 0.033 ±<br>0.003 | 0.297<br>±     | 0.451<br>±     |
|          |                  | 0.116<br>0.058 | 0.013<br>0.007 |                  | 0.336<br>0.208 | 0.009           |                  | 0.021<br>0.038 | 0.021<br>0.030 |

Data are presented as mean ± SEM. N = 5-6. SV: seminal vesicle

**Supplementary table 2. Serum cytokine/chemokine levels.**

| Cytokine (pg/ml) | Treatment           |                     |
|------------------|---------------------|---------------------|
|                  | NR                  | EGPs                |
| Eotaxin          | 2970.25 ± 440.47    | 4301.66 ± 1083.52   |
| G-CSF            | 406.45 ± 77.55      | 1034.87 ± 546.70    |
| GM-CSF           | 763.53 ± 95.32      | 845.28 ± 55.68      |
| IL-1 $\alpha$    | 4347.63 ± 831.92    | 4755.34 ± 339.93    |
| IL-1 $\beta$     | 6342.79 ± 2121.74   | 4371.32 ± 486.55    |
| IL-2             | 711.65 ± 121.77     | 876.99 ± 103.55     |
| IL-4             | 46.26 ± 21.18       | 58.33 ± 38.49       |
| IL-3             | 27.14 ± 6.10        | 136.06 ± 82.55      |
| IL-5             | 80.15 ± 16.36       | 279.45 ± 182.13     |
| IL-6             | 64.29 ± 16.06       | 221.92 ± 135.23     |
| IL-7             | 50128.06 ± 15380.78 | 70055.99 ± 18013.96 |
| IL-9             | 1114.03 ± 141.00    | 1292.20 ± 94.92     |
| IL-10            | 5678.85 ± 979.60    | 9644.43 ± 764.86*   |
| IL-12p40         | 6045.27 ± 1753.36   | 4394.39 ± 466.23    |
| IL-12p70         | 1359.61 ± 245.54    | 2539.83 ± 759.38    |
| IL-13            | 3899.14 ± 718.32    | 4679.18 ± 506.46    |
| IL-17            | 72.34 ± 15.24       | 192.68 ± 114.37     |
| INF- $\gamma$    | 184.46 ± 32.82      | 226.71 ± 27.06      |
| IP-10            | 378.38 ± 30.18      | 443.42 ± 64.93      |
| KC               | 124.82 ± 13.78      | 160.68 ± 16.37      |
| LIF              | 3506.53 ± 979.27    | 5456.64 ± 1285.81   |
| LIX              | 12929.31 ± 452.20   | 13108.39 ± 729.31   |
| M-CSF            | 9668.53 ± 2019.88   | 10231.14 ± 1334.67  |
| MCP-1            | 802.98 ± 83.29      | 1060.02 ± 111.07    |
| MIG              | 5875.32 ± 847.08    | 10975.98 ± 1547.85  |
| MIP-1 $\alpha$   | 712.39 ± 79.62      | 825.76 ± 39.39      |
| MIP-1 $\beta$    | 394.28 ± 47.30      | 428.82 ± 27.27      |
| MIP-2            | 1805.22 ± 214.85    | 1885.70 ± 120.40    |
| RANTES           | 148.36 ± 26.62      | 401.14 ± 209.15     |
| TNF- $\alpha$    | 200.38 ± 26.12      | 292.54 ± 33.32      |
| VEGF             | 86.62 ± 19.51       | 123.15 ± 16.40      |

\*, P &lt; 0.01
